# Supplementary material for: Expression of NMNAT1 in the photoreceptors is sufficient to prevent NMNAT1-associated retinal degeneration
Source: PubMed Central journal article supplement — Mol Ther Methods Clin Dev. 2023 Apr 18;29:319–28. doi: 10.1016/j.omtm.2023.04.003 (PMC10193288; doi:10.1016/j.omtm.2023.04.003), 2023-04-18
Supplement: mmc1.pdf [file mmc1.pdf]

OMTM, Volume 29

## Supplemental information

**Expression of NMNAT1 in the photoreceptors  
is sufficient to prevent *NMNAT1*-associated  
retinal degeneration**

**Emily E. Brown, Michael J. Scandura, and Eric A. Pierce**

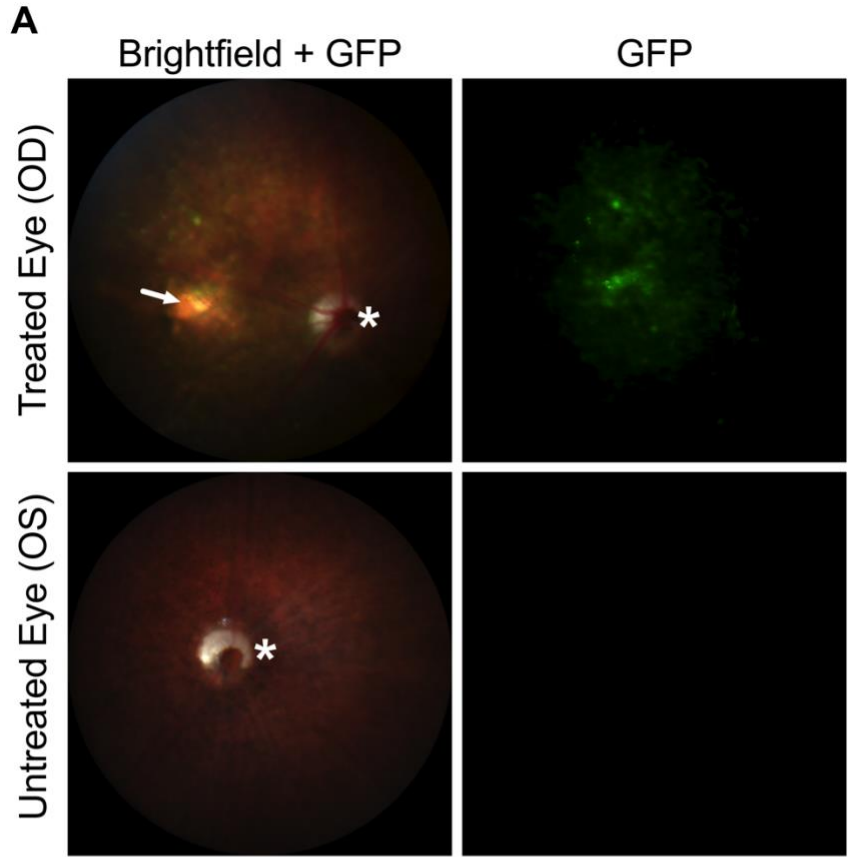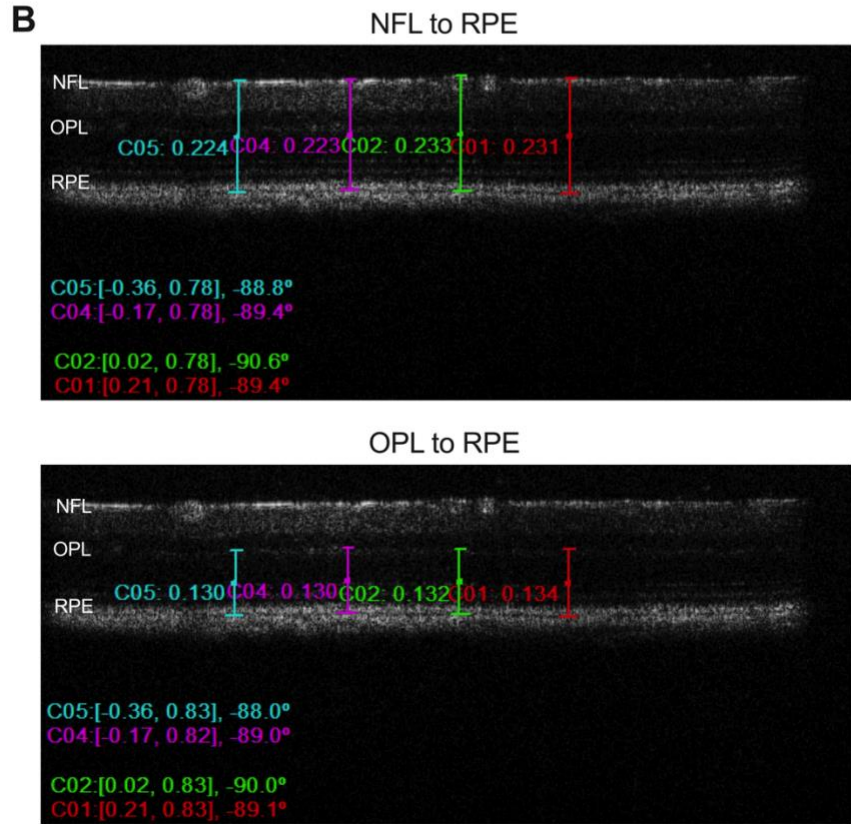

**Figure S1. Fundus photography and optical coherence tomography.** (A) Fundus images showing a representative treated eye (top row) and untreated eye (bottom row) in the brightfield and GFP filter channels. \* Indicates the optic nerve head. The arrow indicates the injection site. (B) Representative OCT images showing how the measurements of retina thickness were measured from the nerve fiber layer (NFL) to retinal pigment epithelium (RPE) (top image) or from the outer plexiform layer (OPL) to the RPE (bottom image).

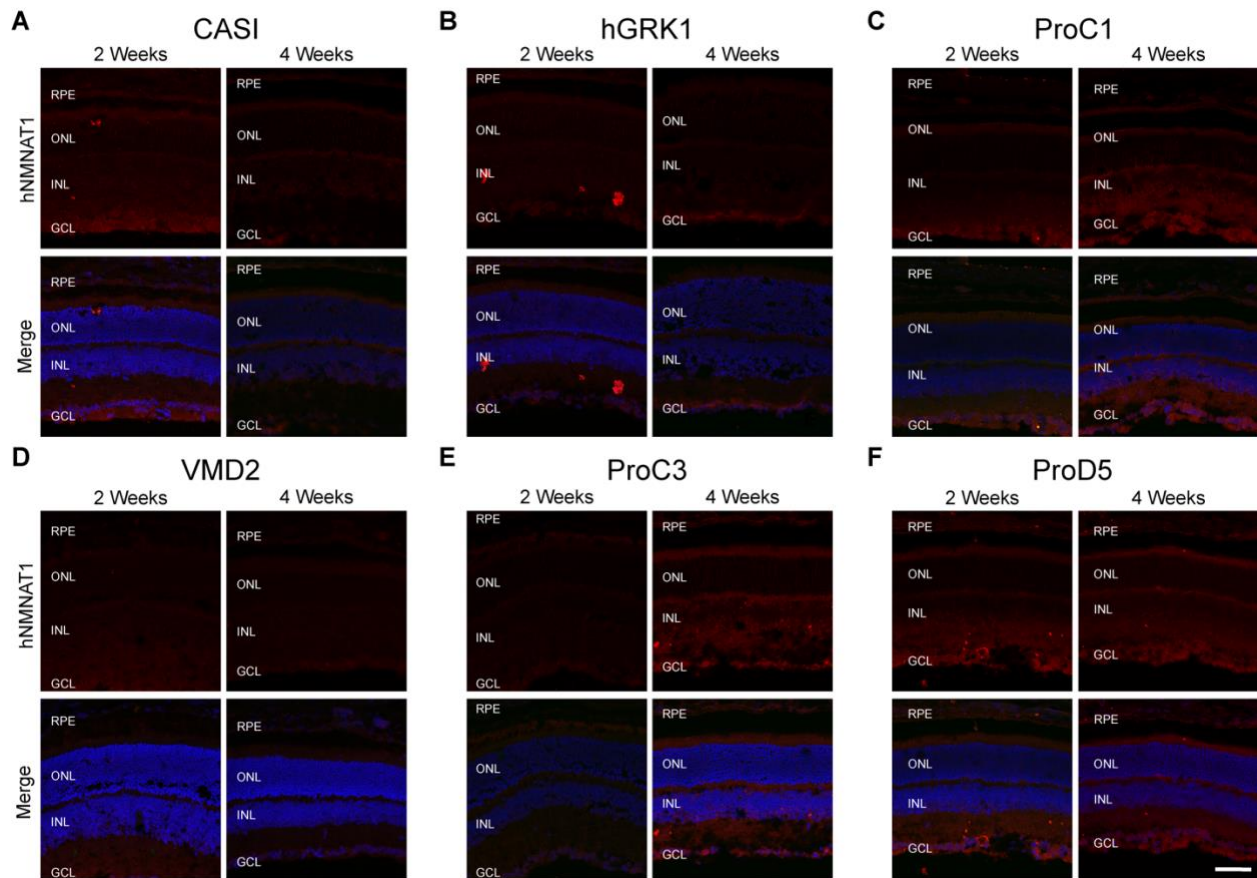

**Figure S2. hNMNAT1 expression is not present in the untreated contralateral eye.**

Immunohistochemistry from the contralateral untreated eye. Top panels show lack of staining with an antibody specific to human NMNAT1 (hNMNAT1) (red) two weeks and 4 weeks post injection in the contralateral eye. Any red signal is autofluorescence.

Bottom panels show counterstaining with DAPI (blue) and show no signal in the green channel (no GFP signal). The treatments administered to the contralateral eyes include delivery of AAV9 with hNMNAT1 expression driven by the (A) CASI promoter, (B) ProC1 promoter, (C) VMD2 promoter, (D) ProC3 promoter, (E) ProD5 promoter, and (F) hGRK1 promoter. Note that any fluorescence seen is autofluorescence. Abbreviations:

retinal pigment epithelium (RPE); outer nuclear layer (ONL); inner nuclear layer (INL); ganglion cell layer (GCL). Scale bars indicate 20  $\mu\text{m}$ .

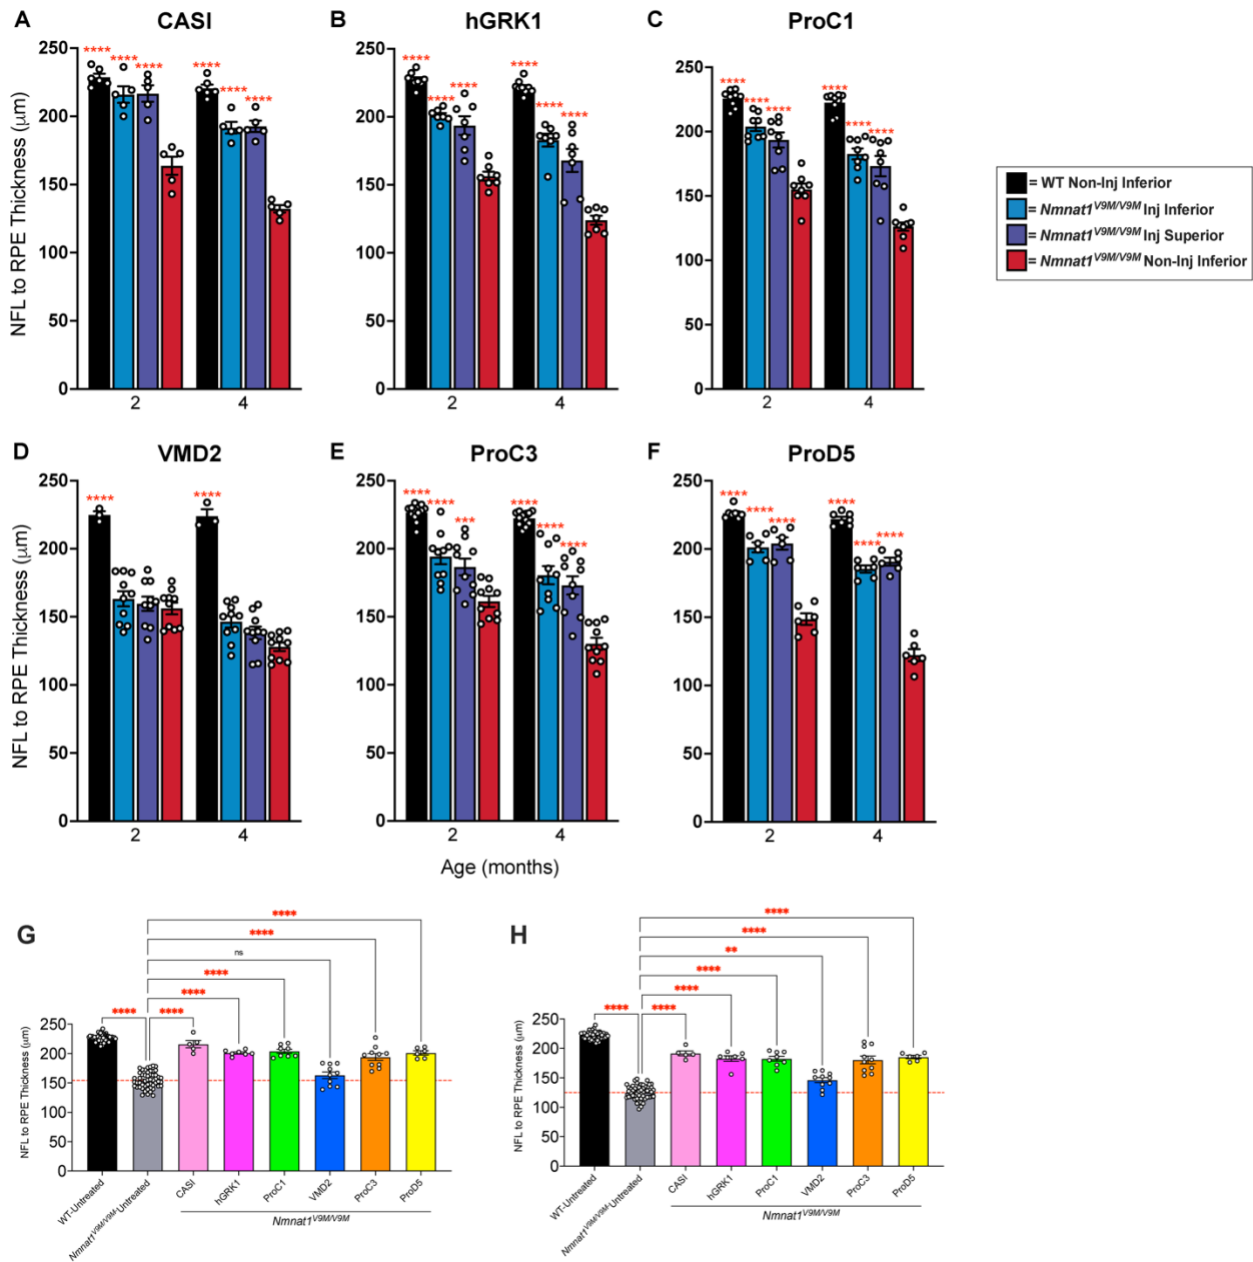

**Figure S3. Retinal thickness is preserved with expression of NMNAT1 in the neural retina.** Measurements of retinal thickness measured from the nerve fiber layer (NFL) to the retinal pigment epithelium (RPE). Measurements are based on SD-OCT imaging of retinas from mice treated with scAAV9 with promoters driving expression of hNMNAT1 in various cell types. (A-F) Measurements include the retinal thickness of untreated WT mice (black), the inferior region of treated *Nmnat1*<sup>V9M/V9M</sup> retinas, adjacent

to the injection site (blue), the superior region of treated *Nmnat1*<sup>V9M/V9M</sup> retinas, distal to the injection site (purple), and untreated *Nmnat1*<sup>V9M/V9M</sup> contralateral eyes (red). The promoters used include (A) CASI (most cell types), (B) hGRK1 (rods and RPE), (C) ProC1 (photoreceptors), (D) VMD2 (RPE), (E) ProC3 (ganglion cells), (F) ProD5 (rods). Measurements of retinal thickness measured from the nerve fiber layer (NFL) to RPE at 2 months (G) and 4 months of age (H). Measurements for *Nmnat1*<sup>V9M/V9M</sup> untreated retinas represent the average retinal thickness for the untreated contralateral eye for all groups. Wild type (WT) untreated measurements represent the average retinal thickness for the untreated contralateral eye from all WT groups. Measurements represent the thickness in the inferior region of the retina (closest to the injection site). All treated eyes were treated with scAAV9 with the respective promoter driving expression of hNMNAT1. This virus was delivered at 1E9 vg/ $\mu$ l and co-injected with AAV9 CMV.GFP at a titer of 1E8 vg/ $\mu$ l. The red dashed line represents the mean thickness of the untreated *Nmnat1*<sup>V9M/V9M</sup> retinas at the respective age. Statistically significant preservation of retinal thickness between untreated and treated *Nmnat1*<sup>V9M/V9M</sup> retinas are noted by red asterisks (for all graphs:  $n \geq 3$  WT and  $n \geq 5$  *Nmnat1*<sup>V9M/V9M</sup> mice for each group at each age, 2Way ANOVA, multiple comparisons,  $P < 0.05$ , error bars represent the SEM, points represent the respective retinal thickness for each eye from a single mouse). Abbreviations: nerve fiber layer (NFL); retinal pigment epithelium (RPE); inner nuclear layer (INL); ganglion cell layer (GCL); spectral-domain optical coherence tomography (SD-OCT).

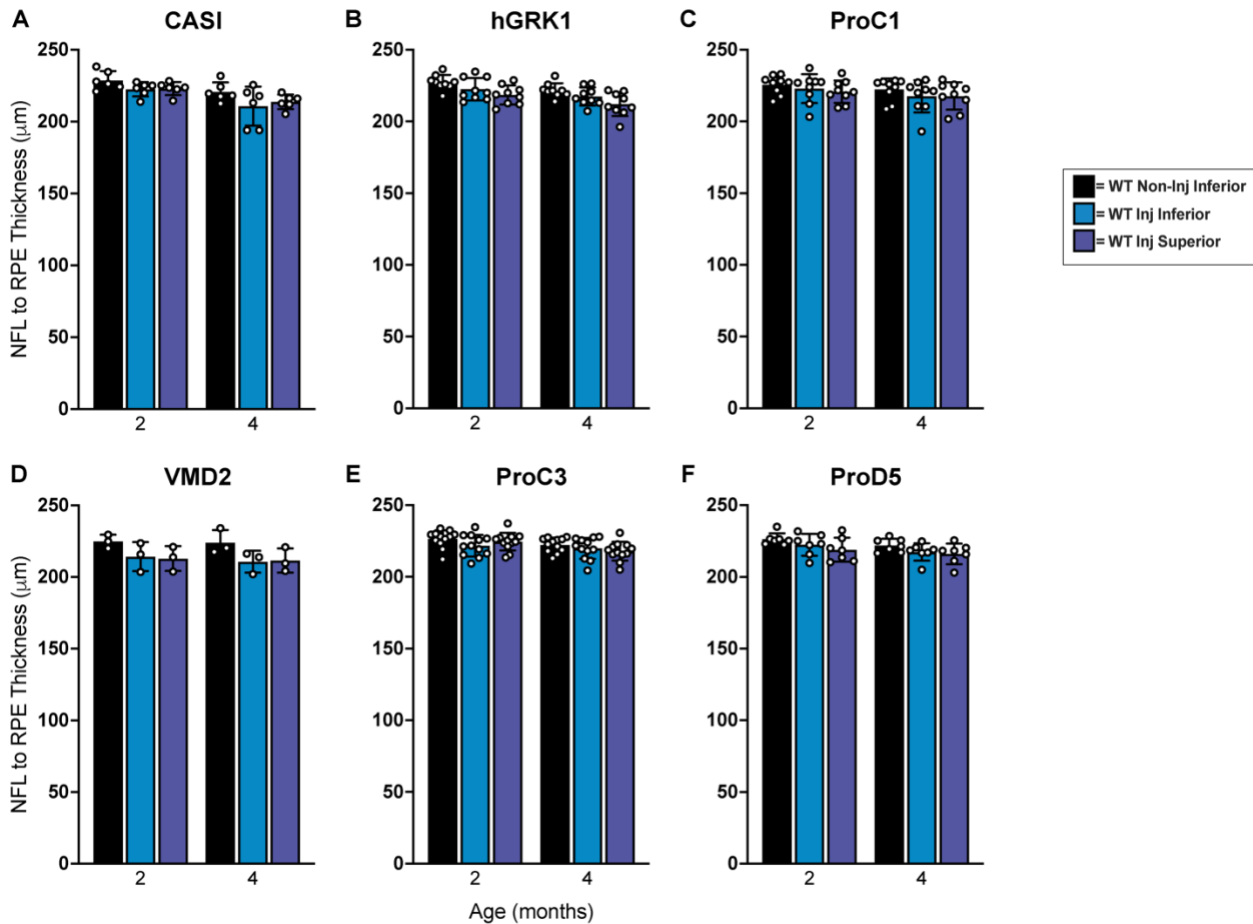

**Figure S4. Total retinal thickness measurements show expression of hNMNAT1 is not toxic in the WT retina.** Measurements of retinal thickness measured from the nerve fiber layer (NFL) to the retinal pigment epithelium (RPE). Measurements are based on SD-OCT imaging of retinas from mice treated with scAAV9 with promoters driving expression of hNMNAT1 in various cell types. Measurements include the retinal thickness of untreated WT mice (black), the inferior region of treated WT retinas, adjacent to the injection site (blue), and the superior region of treated WT retinas, distal to the injection site (purple). The promoters used include (A) CASI (most cell types), (B) ProC1 (photoreceptors), (C) VMD2 (RPE), (D) ProC3 (ganglion cells), (E) ProD5 (rods), (F) hGRK1 (rods and some RPE). There are no significant differences in the retinal thickness between treated and untreated retinas ( $n \geq 3$  mice per group, 2Way ANOVA,



multiple comparisons,  $P > 0.05$ , error bars represent the SEM, points represent the respective retinal thickness for each eye from a single mouse).

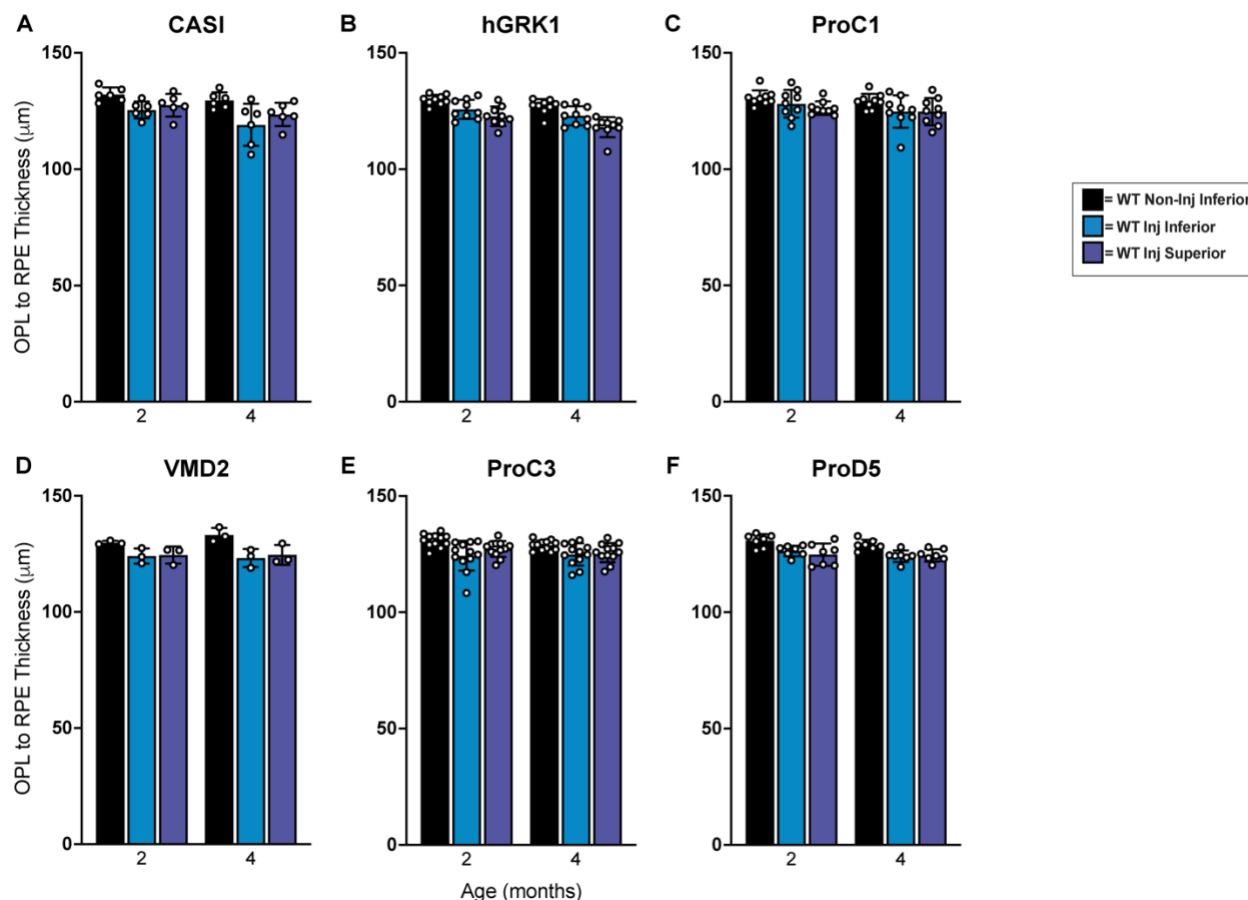

**Figure S5. Photoreceptor thickness measurements show expression of hNMNAT1 is not toxic in the WT retina.** Measurements of retinal thickness measured from the outer plexiform layer (OPL) to the retinal pigment epithelium (RPE). Measurements are based on SD-OCT imaging of retinas from mice treated with scAAV9 with promoters driving expression of hNMNAT1 in various cell types. Measurements include the retinal thickness of untreated WT mice (black), the inferior region of treated WT retinas, adjacent to the injection site (blue), and the superior region of treated WT retinas, distal to the injection site (purple). The promoters used include (A) CASI (most cell types), (B) ProC1 (photoreceptors), (C) VMD2 (RPE), (D) ProC3 (ganglion cells), (E) ProD5 (rods), (F) hGRK1 (rods and some RPE). There are no significant differences in the retinal thickness between treated and untreated retinas ( $n \geq 3$  mice per group, 2Way ANOVA,

multiple comparisons,  $P > 0.05$ , error bars represent the SEM, points represent the respective retinal thickness for each eye from a single mouse).

**Table S1**

Promoter name, sequence used, cell type expression, and references, if applicable.

| Promoter | Promoter Sequence                                                                                                                                                                                                                                                                                                                                                                                                                                                                                                                                                                                                                                                                                                                                                                                                                                                                                                                                                                                                                                                                                                                                        | Cell Expression                   | Reference      |
|----------|----------------------------------------------------------------------------------------------------------------------------------------------------------------------------------------------------------------------------------------------------------------------------------------------------------------------------------------------------------------------------------------------------------------------------------------------------------------------------------------------------------------------------------------------------------------------------------------------------------------------------------------------------------------------------------------------------------------------------------------------------------------------------------------------------------------------------------------------------------------------------------------------------------------------------------------------------------------------------------------------------------------------------------------------------------------------------------------------------------------------------------------------------------|-----------------------------------|----------------|
| CASI     | ggagttccgcttacataaacttacggtaaattggcccgcctggctgac<br>cgccaacgacccccgccattgacgtcaataatgacgatgttcc<br>catagtaacgccaataggactttcattgacgtcaatgggtggagt<br>atttacggtaaactgccacttggcagtacatcaagtgtatcatatgc<br>caagtacgccccctattgacgtcaatgacggtaaattggcccgcctg<br>gcattatgccagttacatgacattatgggactttcctacttggcagtac<br>atctactgattatgcatcgctattaccatggcaggtgagccccacg<br>ttctgcttactctccccatctccccccctccccaccccccaattttgat<br>ttatttttttaattttttgtgcagcgatgggggcgggggggggggg<br>ggggcgcgcgccaggcggggcggggcggggcgaggggcggg<br>gcggggcgagggcgagaggtgcggcggcagccaatcagagcg<br>gcgcgctccgaaagtctttatggcgaggcggcggcggcggcg<br>gccataaaaaagcgaagcgcgcggcggggcgggagtcgctgcg<br>cgctgccttgcctccgctccccgctccgcccgcctcgcgcgcc<br>cgccccggctctgactgaccgcgttactaaacaggttaagtccggc<br>ctccgcgcggggtttggcgcctcccgcgggcggccccctctcac<br>ggcgagcgtgccacgtcagacgaagggcgcagcgagcgtcct<br>gatcctccgcccggacgctcaggacagcggcccgtgctcataa<br>gactcggccttagaaccacagatcagcagaaggacattttaggac<br>gggacttgggtgactctagggcactggtttcttccagagagcgga<br>acaggcgaggaaaagtagtcccttctcggcgattctgcggagggat<br>ctccgtggggcggtgaacgccgatgatgccttactaaccatgttca<br>tgttttctttttctacaggtcctgggtgacgaacag | PRs, RPE,<br>inner retina,<br>RGC | PMID: 32775493 |
| hGRK1    | atggaaaattccgagaagactgaagtggctgttggcatgtggatc<br>gtcaaccccatcaccaacatgcatctgcgcctcttgaactgccaa<br>agactacatgaatggaactggaagatacactgtggtaaaggcat<br>catctcccagtgggggatgcatacaagaagaaggcctgatccct<br>gcctaccaccgggtcatcatggctgagctggctaccaagaactcaa<br>aatgggtggaagtggacacctgggagtcactgcaaaaggagtg<br>aaggaaacccttaaagtctgcggcatcaccagaaaagctgga<br>agcctcggactgtgaccaccagcagaacagccccaccctgaac<br>gccagggagaaagcgaagtggactgagaccaagactcaag<br>ccagaagaagtgcctggaaccaagaccaaaagctgtccaaag<br>gtgaaactcctctgtggagctgacctcctggaatcgtttgctgtgccta<br>atctctggaagtcggaagatcacccaaattgtggctaactatggc<br>ctgatctgtgactagagctggaatgatgccagaaattcatctat<br>gaatcagatgtgctgtggaagcaccggagcaacatccatgtgtca<br>atgagtgattgcaaatgacatctcctccaccaagatcagaagggc<br>cctgaggcggggacagtcgatcaggtacttggccagacctgtc<br>caaggtacattgaaaagcacaacctctacagctcagagtcagag<br>gatcgcaatgcaggagtgatcctggcccctctccagcgggaactg<br>cagaagctaagacatag                                                                                                                                                                                                                                      | PRs and RPE                       | PMID: 20428215 |

|       |                                                                                                                                                                                                                                                                                                                                                                                                                                                                                                                                                                                                                                                                                                                                                                                                                                                                                                                                                                                                                                    |                  |                |
|-------|------------------------------------------------------------------------------------------------------------------------------------------------------------------------------------------------------------------------------------------------------------------------------------------------------------------------------------------------------------------------------------------------------------------------------------------------------------------------------------------------------------------------------------------------------------------------------------------------------------------------------------------------------------------------------------------------------------------------------------------------------------------------------------------------------------------------------------------------------------------------------------------------------------------------------------------------------------------------------------------------------------------------------------|------------------|----------------|
| ProC1 | <p>           agatctattagtaaaattaactacacctggctctttatgtcattaactac<br/>           acgtcagtcggttctattattaactacacagaacttactatataattaact<br/>           acaccgcgcatthggataattaactacacaactttgcttaataaatta<br/>           actacacccgtaacggattctcattaactacacgfttcattacgaggg<br/>           attaactacacatagccccggaggcattaactacacttttgaggtc<br/>           gcaataactacactcgcactcgcaggacattaactacactataacc<br/>           gataacgcaattaactacacaaatthttatgaagattaactacactgt<br/>           tcgctcctgcctattaactacacgaggccgtatttccaattaactacac<br/>           ccgagacacaagataattaactacacttaaccagatggcagattaa<br/>           ctacacgtacgggcaggcccgattaactacaccggctgtcattcctc<br/>           attaactacacatatcacgactgtgattaactacacgctcgagatct<br/>           gcgatctgcatctcaattagtcagcaaccatagtcggcccctaact<br/>           ccgcccattcccggcccctaactccgcccagtccgcccatttccgccc<br/>           ccatcgctgactaathttttatthttatgcagaggccgaggccgctcg<br/>           gcctctgagctattccagaagtagtgaggaggctthttggaggccta<br/>           ggctthtgcaaa         </p> | PRs              | PMID: 31285614 |
| VMD2  | <p>           caattctgcatthttactagggtgatgaaattccaagcaacaccatc<br/>           cthttcagataagggcactgaggctgagagaggagctgaaaccta<br/>           cccggcgtcaccacacacaggtggcaaggctgggaccagaaac<br/>           caggactgtgactgcagcccgtattcattctthccatagcccacag<br/>           ggctgtcaaagaccccaggcctagtcagaggctcctcctctctgg<br/>           agagttcctggcacagaagttgaagctcagcacagcccctaacc<br/>           cccaactctctgcaaggcctcagggtcagaacactggaggagc<br/>           agatcctthtagcctctggatthtagggccatggtagagggggtgtgc<br/>           cctaaattccagccctggtctcagcccaacaccctccaagaagaa<br/>           attagagggccatggccaggctgtgctagccgtgctctctgagcag<br/>           attacaagaagggaaccaagacaaggactcctthgtggaggtcctg<br/>           gcttagggagtcaagtgacggcggctcagcactcacgtgggcagt<br/>           gccagcctcaagagtgggcaggggcactggccacagagtccca<br/>           gggagtcccaccagcctagtcgccagacc         </p>                                                                                                                                                 | RPE              |                |
| ProD5 | <p>           atcctggggtthaaacaggactaggctcactgggagaagaggaag<br/>           tcaaacaggactagtcgataggctagccagcttaattaatcaga<br/>           thttccaggaagaggcaccagagccctctccctattgctcaaagcgc<br/>           aggtggaataatctggccgtgtgaccggaattcaaagcagthttgg<br/>           gaactgagcccaacctgtaagccctgatgtthttcaagaaagatg<br/>           gtgtcagaatthaaattggattagagaggaggatattgattagagca<br/>           gagcagcatcctcacatggtcctgctggagttagtagagggtta         </p>                                                                                                                                                                                                                                                                                                                                                                                                                                                                                                                                                                          | Rods             | PMID: 31285614 |
| ProC3 | <p>           Aaagctggaactggggccggaacagctgagggtgccagccg<br/>           gaaactcgaaatcaacgtaggccggaactattcgatgaattccgc<br/>           cggaaactaggctcggaggactgccggaacacctgtaataag<br/>           ccggcggaaacctgtgtgcccgtatgccggaacgtcttaattgga<br/>           cgtgccggaactctthtaagagttcgccggaaccagaccagcc<br/>           gagctgccggaaccggttatataagaacggccggaacgggtcca<br/>           caggaaaaagccggaacacccaaacggttagcggcggaaac<br/>           gactggggaggacgtgccggaacgtactatctgaagatgccgg         </p>                                                                                                                                                                                                                                                                                                                                                                                                                                                                                                                                | RGC,<br>some PRs | PMID: 31285614 |

aaacacttgaaagctccaagccggaacgggcccgtgcggatag  
ccggaactgacggtacacggccggaacactactgtatg  
tagccggaactggcggtggctgggcccggaacgctcgagatc  
tgcgatctgcatctcaattagtcagcaaccatagcccgccctaact  
ccgccatcccgccctaactccgccagtccgccatttccgcc  
ccatcgctgactaattttttatftatgcagaggccgaggccgctcg  
gcctctgagctattccagaagtagtaggaggctttttggaggccta  
ggctttgcaaa

IRBPeGN  
AT2p

gatgtgaccatagtacttgagcattacacaaatcctaagagctaa  
aaatatgttttttagctaattgacctttggccttcataaagcagttg  
gtaaacatcctcagataatgatttcaaagagcagattgtgggtctc  
agctgtgtagagaaagcccacgtccctgagaccaccttctccagct  
gcctactgaggcacacactgctctctcacctgccatcgtacagacc  
agcttttaggggagccaagtgggatactcaatccaactttttccttc  
tctccatctcacatacaggaaaccttacgagagaggattaggggc  
ctgaaaaagctgacaagacggcaaatatgggaagtggagccagt  
gctgaggacaaagaactggccaagaggtccaaggagctagaaa  
agaagctgcaggaggatgctgataaggaagccaagactgtcaag  
ctgctactgctgggtgagtga

Sparce cones

PMID: 24664760
